# Supplementary material for: Twinkle helicase is essential for mtDNA maintenance and regulates mtDNA copy number
Source: Oxford University Press journal article supplement (doi:10.1093/hmg/ddh342), 2004-10-27
Supplement: ddh342_Supplementary_Data.zip [file ddh342_Supplementary_Data.zip]

Archive with 8 entries (8 files):
- Print_supplementary_figure_1.pdf
- Print_supplementary_figure_6.pdf
- Print_supplementary_figure_2.pdf
- Print_supplementary_figure_3.pdf
- Print_supplementary_figure_4.pdf
- Print_supplementary_tableI.pdf
- Supplementary_materials.pdf
- Print_supplementary_figure_5.pdf
