# Supplementary material for: Twinkle helicase is essential for mtDNA maintenance and regulates mtDNA copy number
Source: Oxford University Press journal article supplement (doi:10.1093/hmg/ddh342), 2004-10-27
Supplement: ddh342_Supplementary_Data.zip [file ddh342_Supplementary_Data.zip › Print_supplementary_tableI.pdf]

| oligo name | oligo sequence 5' → 3'                        | oligo name | oligo sequence 5' → 3'                                              |
|------------|-----------------------------------------------|------------|---------------------------------------------------------------------|
| A          | GCAAGATCTGCTTGGAGTACGGGGTCC                   | R          | CAGGTGATGTTTTGCTAAACAGGGGGGT                                        |
| B          | GGAAGA <sup>1</sup> CTTCAACCTGAGGACTTGGAGGT   | S          | GGTTCGTTTGTTCACGA <sup>1</sup> AAAGTCCTACGTG                        |
| C          | TCAAGTCGTTGG <sup>1</sup> GCAGAAG             | T          | GCAAAGCAUCAGGACUGUAAUAGAU                                           |
| D          | AAGTGGGCAAAGGAAAAGGT                          | U          | GGAAAGAGGALGALGACAAGGAACL                                           |
| E          | ACACCGACAACCCCTAGCATC                         | V          | UGUUJGCACGAAAACUGAAACCCCAA                                          |
| F          | CCAGCCCTCAGACCCCTCAC                          | W          | GGGCGAGCTGACGG <sup>1</sup> CTT                                     |
| G          | CGTATTCTTCTACGGGGCTACCTGGCTGC                 | X          | GGCATCTCACTGATGAATCTCG                                              |
| H          | CCAGGCAGCTACGGGGCTACCAAGAATAAG                | Y          | FAM-ACAGCCGCCAACAGGCACTGGAAAG <sup>1</sup> -TAMRA                   |
| I          | G <sup>1</sup> CATTCAACCCCTCGGAAGA            | Z          | GAAGGTGAMGG <sup>1</sup> CGGAGTCAAC                                 |
| J          | CGTTACCTTCTOCATCCAC                           | AA         | CAGAGTTAAAAGCAGCCCTGGT                                              |
| K          | TGCAG <sup>1</sup> CATGA <sup>1</sup> GGGTCAC | AB         | JOE <sup>1</sup> GGTCCG <sup>1</sup> A <sup>1</sup> GGGCG-TAMRA     |
| L          | TGCTGTCTGCAGTTCTTGT                           | AC         | GGCTGGCTGATCTTCCAAAT                                                |
| M          | AGTTCGGTCGGATTGTGTTG                          | AD         | AAGGTAGCGGATGATTCAGCC                                               |
| N          | BIO-CTGCTTTCAGCAGACCAT <sup>1</sup> C         | AF         | TFT-CACCAAGAGCCCTCAACGGCTT-TAMRA                                    |
| O          | CTTCCCCG <sup>1</sup> ATTCTTCGTAC             | AF         | TTTTTG <sup>1</sup> GTGCTCTCCAGGTCT                                 |
| P          | CTTACCTTGAACAGTTCCGTC                         | AG         | TGGTCACTGGTTGGTTGGC                                                 |
| Q          | BIO GTCCAGGGCATACTCACT <sup>1</sup> GAT       | AH         | FAM CCCTGAACTGCAGAT <sup>1</sup> CACCAATGTGGTAG <sup>1</sup> -TAMRA |
