# Supplementary material for: Twinkle helicase is essential for mtDNA maintenance and regulates mtDNA copy number
Source: Oxford University Press journal article supplement (doi:10.1093/hmg/ddh342), 2004-10-27
Supplement: ddh342_Supplementary_Data.zip [file ddh342_Supplementary_Data.zip › Supplementary_materials.pdf]

*Supplementary materials*

**Supplementary figure 1. Real-time PCR standard curve of Twinkle mRNA.**

**Supplementary figure 2. Transient EtBr treatment: effect on (A) mtDNA copy number determined by QPCR and (B) nucleoid fluorescence intensity by PicoGreen stain .**

**Supplementary figure 3. Twinkle RNAi effect on mitochondrial nucleoid signal 96 hours after transfection.** (A) Untreated control cells and (B) cells transfected with 10 nM dsRNA 1473 were stained with PicoGreen after 96 hours.

**Supplementary figure 4. Twinkle RNAi does not have an effect on a non-target gene also involved in mtDNA metabolism (POLG1).** Real-time PCR analysis of POLG mRNA.

**Supplementary figure 5. RNAi of a different target gene (Tim17a) does not have an effect on Twinkle.** Real-time PCR analysis of Twinkle mRNA.

**Supplementary figure 6. Tim17a RNAi produced a decrease in the target message.** Real-time PCR analysis of Tim17a mRNA.

**Supplementary table I. Sequences of the oligos used in the study.**
