# Supplementary figures and images for: Twinkle helicase is essential for mtDNA maintenance and regulates mtDNA copy number
Source: Oxford University Press journal article supplement (doi:10.1093/hmg/ddh342), 2004-10-27

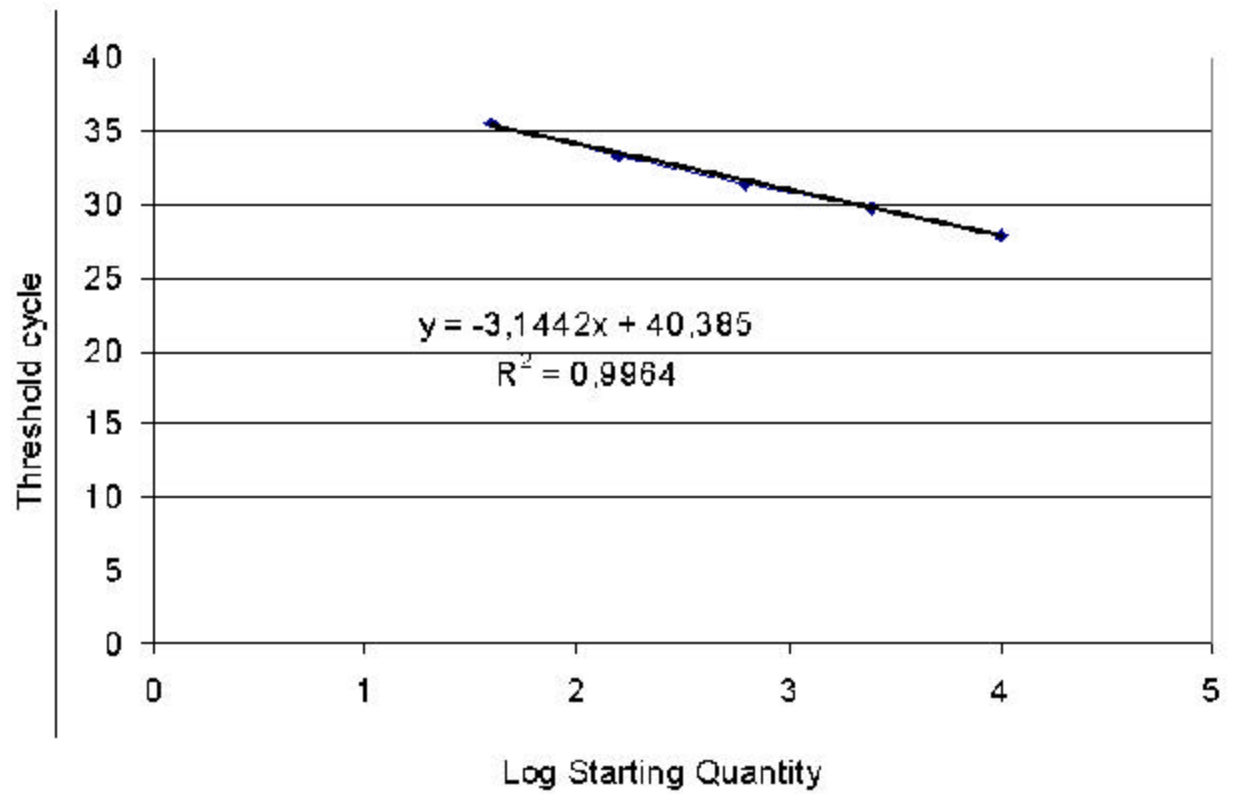

Supplement: ddh342_Supplementary_Data.zip [file ddh342_Supplementary_Data.zip › Print_supplementary_figure_1.pdf]

### Tim17a siRNA

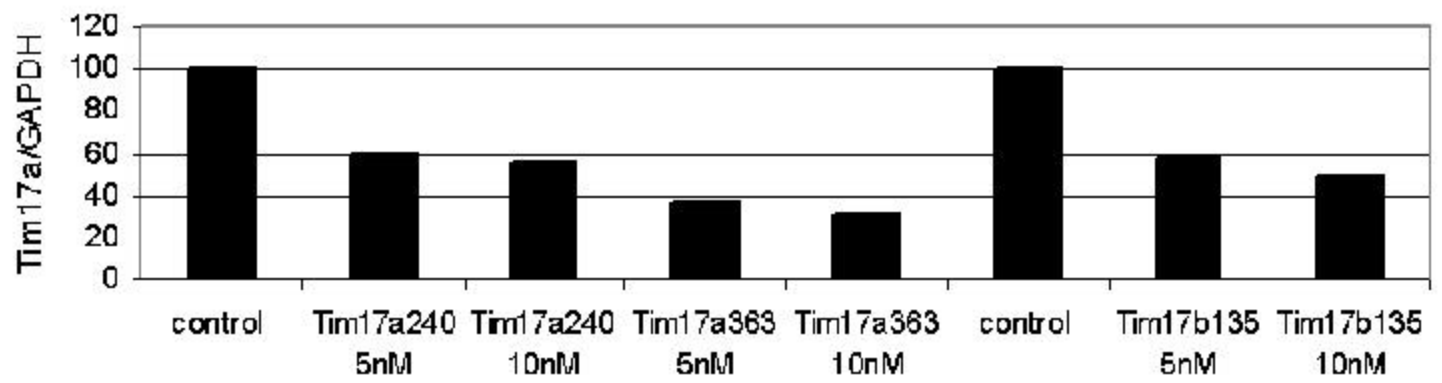

Supplement: ddh342_Supplementary_Data.zip [file ddh342_Supplementary_Data.zip › Print_supplementary_figure_6.pdf]

**A**

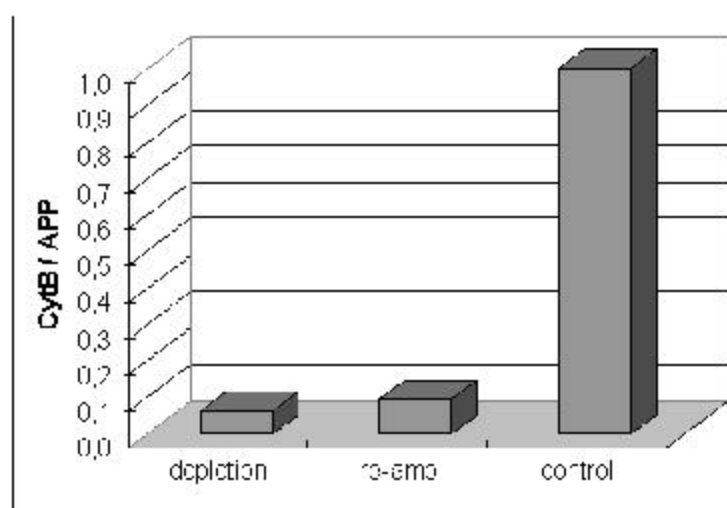

**B**

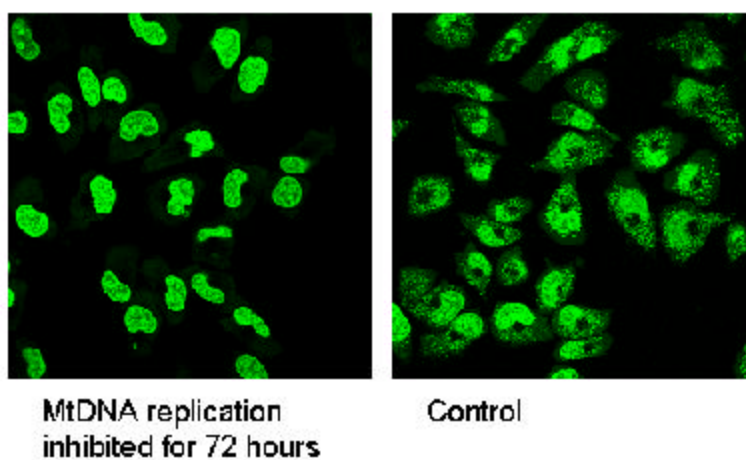

Supplement: ddh342_Supplementary_Data.zip [file ddh342_Supplementary_Data.zip › Print_supplementary_figure_2.pdf]

A

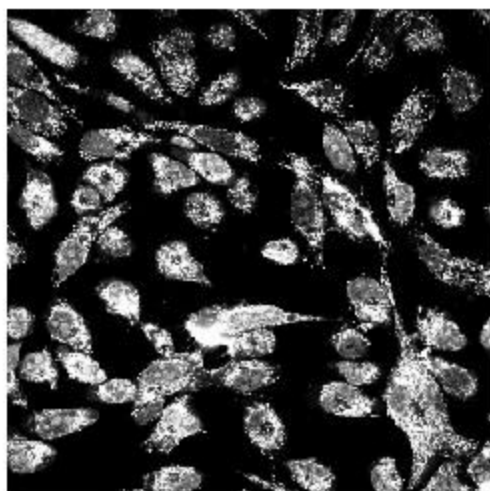

mock-transfected 143B cells,  
96 hours

B

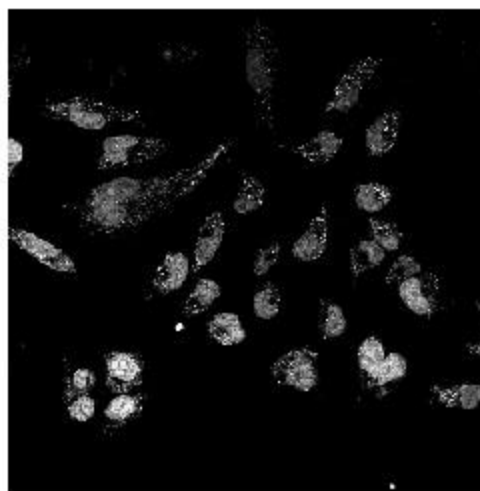

siRNA 1473 transfected 143B cells,  
10 nM, 96 hours

Supplement: ddh342_Supplementary_Data.zip [file ddh342_Supplementary_Data.zip › Print_supplementary_figure_3.pdf]

PolG1 Q-PCR analysis (Independent)

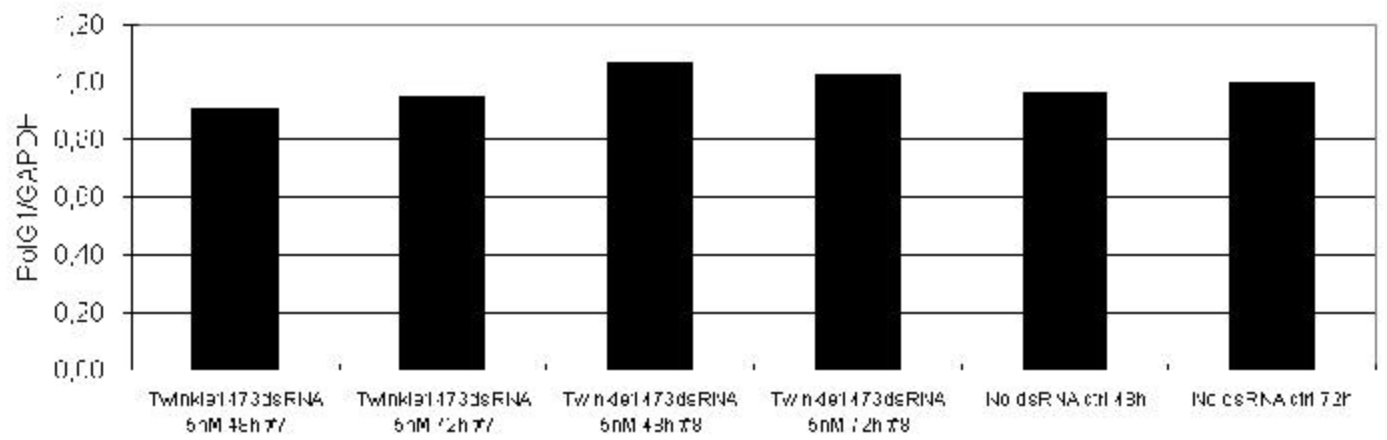

Supplement: ddh342_Supplementary_Data.zip [file ddh342_Supplementary_Data.zip › Print_supplementary_figure_4.pdf]

### Twinkle Q-PCR analysis

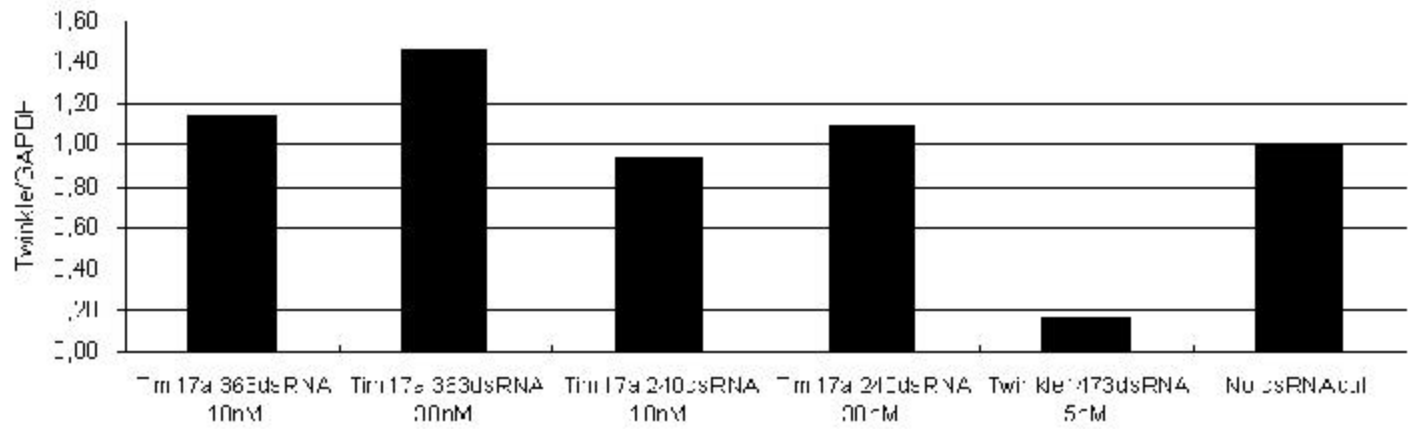

Supplement: ddh342_Supplementary_Data.zip [file ddh342_Supplementary_Data.zip › Print_supplementary_figure_5.pdf]
